# Supplementary material
Source: Royal Society of Chemistry journal article supplement (doi:10.1039/d6nr00642f)
Supplement: d6nr00642f1.pdf [file d6nr00642f1.pdf]

## Electronic Supplementary Information

### Size-Dependent Exciton Dynamics in TADF Nanoparticles for Efficient CO<sub>2</sub>

#### Photoreduction

Yueqian Jia,<sup>†a,b</sup> Bojun Shi,<sup>†a,b</sup> Shuchun Zhang,<sup>a,b</sup> Baipeng Yin,<sup>a</sup> and Lili Chen,<sup>\*a</sup> Chuang Zhang<sup>\*a</sup>

<sup>a</sup> *Key Laboratory of Photochemistry, Beijing National Laboratory for Molecular Sciences, Institute of Chemistry, Chinese Academy of Sciences, Beijing 100190, China*

<sup>b</sup> *University of Chinese Academy of Sciences, Beijing 100049, China*

E-mail: [chenlily@iccas.ac.cn](mailto:chenlily@iccas.ac.cn),

[zhangc@iccas.ac.cn](mailto:zhangc@iccas.ac.cn)

**Table S1 Summary of particle size and distribution from DLS**

| Preparation parameters and variables        | Average particle size and distribution from DLS (nm) |
|---------------------------------------------|------------------------------------------------------|
| SDS–0.4 wt%, 300 seconds at 100% amplitude  | 40.3                                                 |
| SDS–0.3 wt%, 300 seconds at 100% amplitude  | 66.2                                                 |
| SDS–0.2 wt%, 300 seconds at 100% amplitude  | 83.5                                                 |
| SDS–0.05 wt%, 120 seconds at 100% amplitude | 107.5                                                |
| SDS–0.04 wt%, 120 seconds at 100% amplitude | 124.8                                                |
| SDS–0.03 wt%, 120 seconds at 100% amplitude | 133.7                                                |
| SDS–0.02 wt%, 120 seconds at 100% amplitude | 145.4                                                |
| SDS–0.02 wt%, 60 seconds at 100% amplitude  | 154.6                                                |
| SDS–0.01 wt%, 120 seconds at 100% amplitude | 167.6                                                |
| SDS–0.01 wt%, 60 seconds at 100% amplitude  | 177.9                                                |
| SDS–0.01 wt%, 60 seconds at 95% amplitude   | 190.1                                                |
| SDS–0.006 wt%, 60 seconds at 90% amplitude  | 211.4                                                |

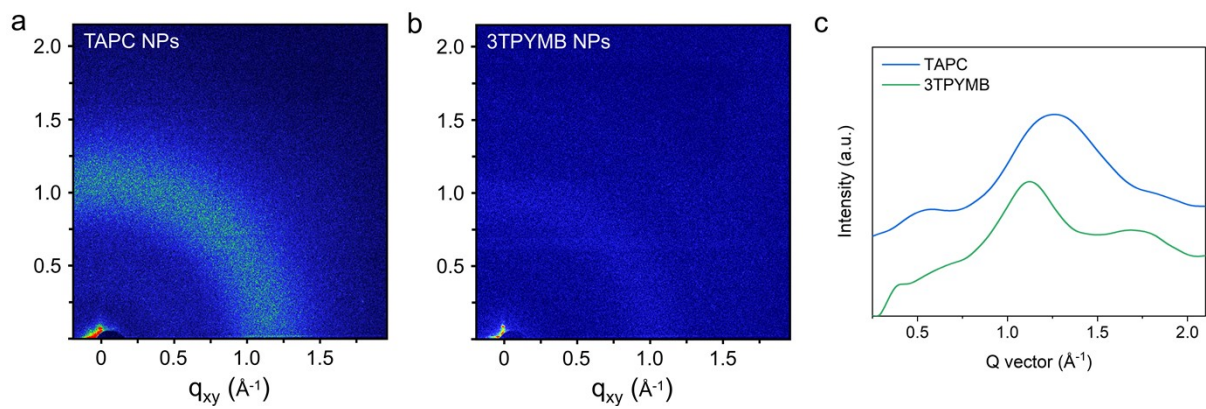

**Fig. S1** 2D GIWAXS patterns of (a) TAPC nanoparticles, (b) 3TPYMB nanoparticles. (c) Corresponding 1D profiles derived from these patterns.

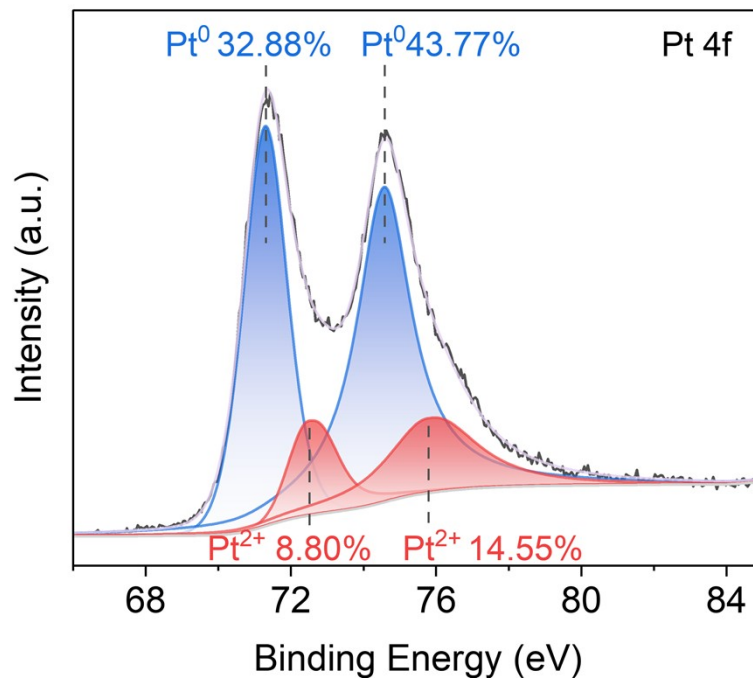

**Fig. S2** Pt 4f XPS spectrum of TAPC:3TPYMB NPs after in situ Pt photodeposition.

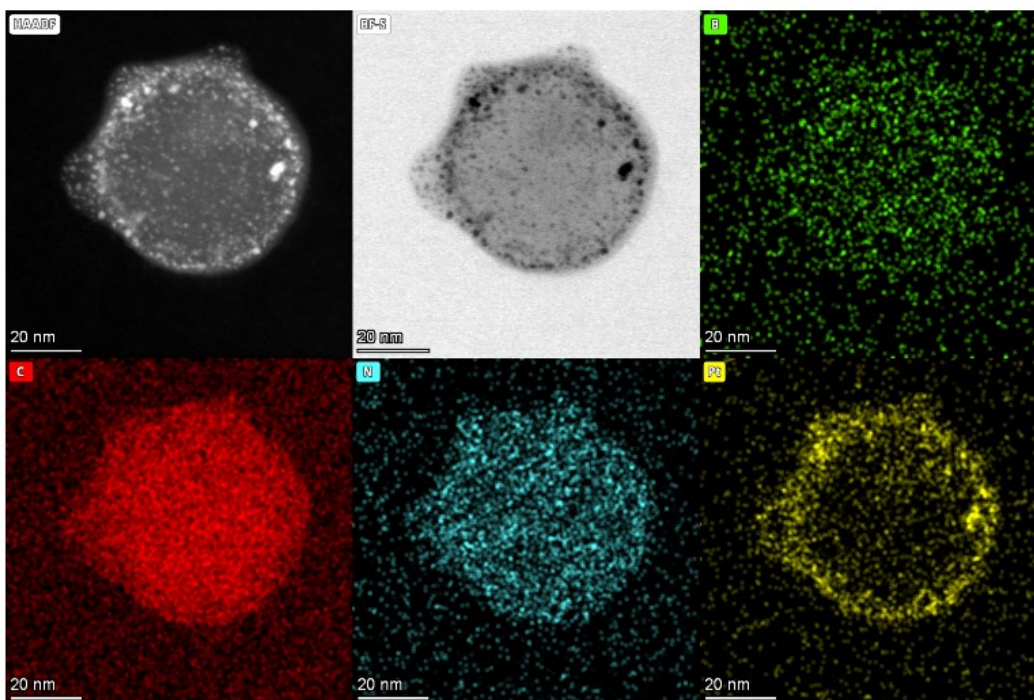

**Fig. S3** HAADF STEM image and elemental mapping of TAPC:3TPYMB NPs after in situ Pt photodeposition, including B, C, N, and Pt distributions.

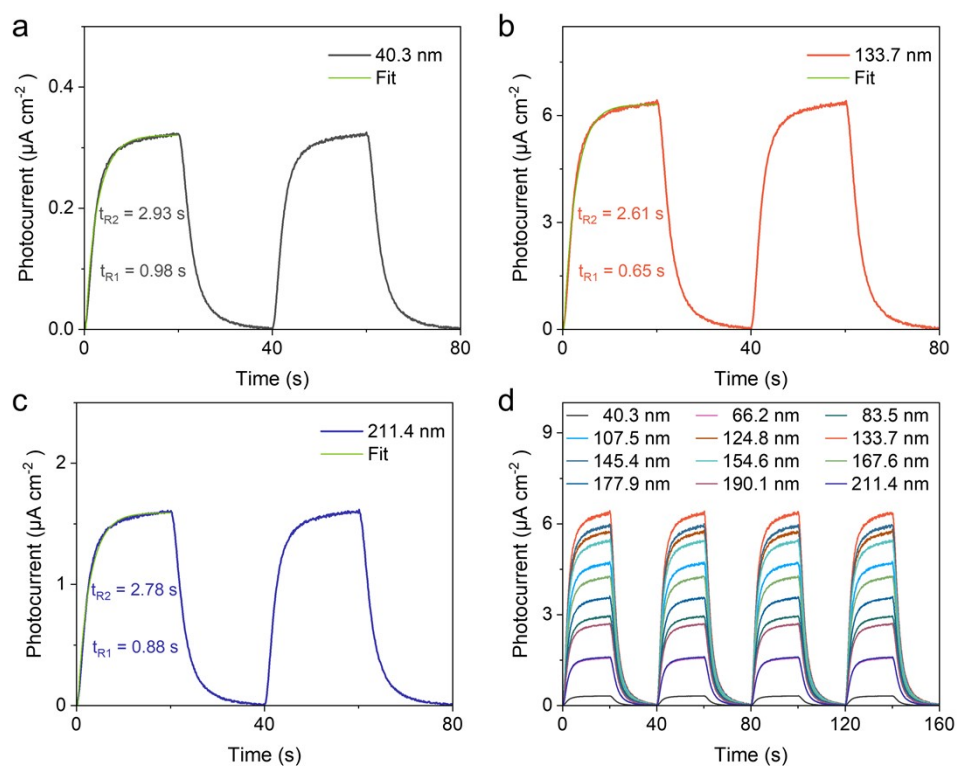

**Fig. S4** Biexponential fitting of the photocurrent rise process for TAPC:3TPYMB NPs with sizes of (a) 40.3 nm, (b) 133.7 nm, and (c) 211.4 nm. The fitted rise time constants are indicated in each panel. Transient photocurrent responses of TAPC:3TPYMB NPs over the full particle-size range under intermittent light irradiation. (d) Current density vs. time of NP films in 0.1 M TEOA solution, the 365 nm LED is employed for illumination ( $50 \text{ mW cm}^{-2}$ ). The TAPC:3TPYMB molar ratio was 4:6.

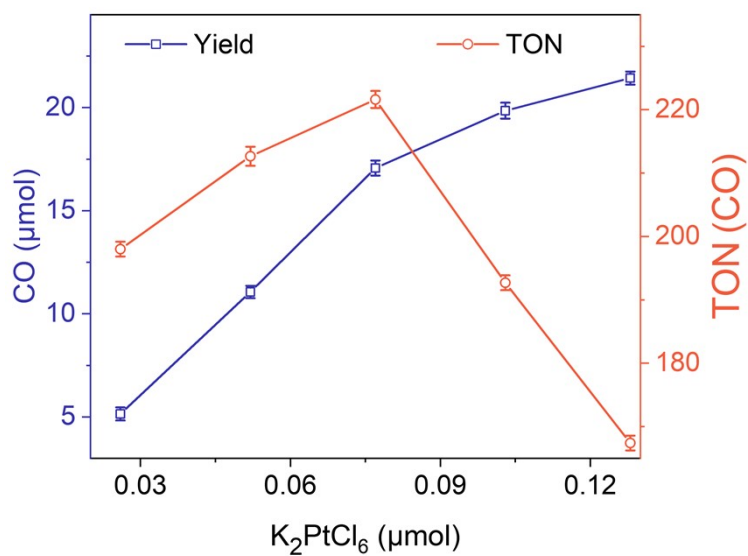

**Fig. S5** Effect of  $K_2PtCl_6$  amount on the photocatalytic  $CO_2$  reduction performance of TAPC:3TPYMB NPs. Reaction conditions: total catalytic solution volume = 5 mL, TAPC:3TPYMB NPs, 9.78  $\mu\text{M}$ ; TEOA, 0.1 M; 365 nm LED irradiation; reaction time, 18 h.

**Table S2 Comparison of photocatalytic CO<sub>2</sub> reduction performance with reported organic and Pt containing systems**

| Catalyst /Photosensitizer                                                                                          | Sacrificial agent | Solvent                                    | Rate (mmol·g <sup>-1</sup> ·h <sup>-1</sup> )/TON  | Light Irradiation / time        | Ref              |
|--------------------------------------------------------------------------------------------------------------------|-------------------|--------------------------------------------|----------------------------------------------------|---------------------------------|------------------|
| <b>Pt (0.077 μM)<br/>TAPC-3TPYMB (9.78 μM)</b>                                                                     | <b>TEOA</b>       | <b>H<sub>2</sub>O (5 mL)</b>               | <b>CO: 68.7<br/>TON: 241.4</b>                     | <b>LED@365nm<br/>18 h</b>       | <b>This Work</b> |
| FeTotpy (10 μM)<br>4CzIPN (50 μM)                                                                                  | TEA               | DMF (5 mL)                                 | CO: 167.5<br>TON: 244                              | LED@420–650nm<br>3 h            | 1                |
| FeL <sup>MeOH</sup> (50 μM)<br>4-DPAIPN (400 μM)                                                                   | DIPEA             | ACN / TFE (5 mL)                           | CO: 295.5<br>TON: 1112                             | 1 sun<br>7 h                    | 2                |
| Co(oTMPyP) (5 μM)<br>4P-DPAIPN (500 μM)                                                                            | Ascorbate         | NaHCO <sub>3</sub> buffer (4mL)            | CO: 96.4<br>TON: 2700                              | LED@450nm<br>21 h               | 3                |
| [Zn(cztpy) <sub>2</sub> ] <sup>2+</sup> (10 μM)<br>4CzIPN (100 μM)                                                 | TEA               | DMA/H <sub>2</sub> O (5 mL)                | CO: 19.5<br>TON: 116                               | LED@420nm<br>6 h                | 4                |
| [Ru(ttpy) <sub>2</sub> ](PF <sub>6</sub> ) <sub>2</sub> (20 μM)<br>4CzIPN (100 μM)                                 | TEA               | CH <sub>3</sub> CN/H <sub>2</sub> O (5 mL) | CO: 53.9<br>TON: 124                               | LED@420–650nm<br>2 h            | 5                |
| Mn (50 μM)<br>3DPAFIPN (250 μM)                                                                                    | TEOA/BIH          | DMA (2mL)                                  | CO: 56.1<br>TON: 538                               | LED@440nm<br>20 h               | 6                |
| [Fe(qpy)(OH <sub>2</sub> ) <sub>2</sub> ] <sup>2+</sup> (50 μM)<br>NPs-23k (20 μM)                                 | TEA/BIH           | CH <sub>3</sub> CN/H <sub>2</sub> O (5mL)  | CO: 282.1<br>TON: 2041                             | Xenon lamp (λ > 400 nm)<br>18 h | 7                |
| Pt (200 mg)<br>C-In <sub>2</sub> O <sub>3</sub> (4 mg)                                                             | TEOA              | H <sub>2</sub> O (200 mL)                  | CO: 0.633<br>TON: 3.165<br>CH <sub>4</sub> : 0.140 | Xe lamp<br>5 h                  | 8                |
| Pt-BiOBr (20 mg)<br>Pt-BiOBr (20 mg)                                                                               | None              | H <sub>2</sub> O (0.1 mL)                  | CO: 0.094<br>TON:/                                 | Xe lamp<br>3 h                  | 9                |
| Fe(qpy) (20 μM)<br>mpg-C <sub>3</sub> N <sub>4</sub> (8 mg)                                                        | TEOA              | CH <sub>3</sub> CN (4 mL)                  | CO:22.7<br>TON: 155                                | Hg lamp<br>17 h                 | 10               |
| Pt-CdS/ZnS (4mg)<br>CdS/ZnS                                                                                        | TEOA              | H <sub>2</sub> O (15 mL)                   | CO: 0.094<br>CH <sub>4</sub> :0.0374<br>TON:/      | Xe lamp (λ ≥ 425 nm)<br>10 h    | 11               |
| AuPt<br>AuPt                                                                                                       | None              | H <sub>2</sub> O (0.08 mL)                 | CO: 1.01<br>TON:/                                  | Xe lamp<br>/                    | 12               |
| Pt-SA/TiO <sub>2</sub> -Ti <sub>3</sub> C <sub>2</sub> (50 mg)<br>TiO <sub>2</sub> -Ti <sub>3</sub> C <sub>2</sub> | None              | H <sub>2</sub> O (5 mL)                    | CO: 0.02<br>TON: /                                 | Xe lamp AM<br>1.5G<br>3 h       | 13               |

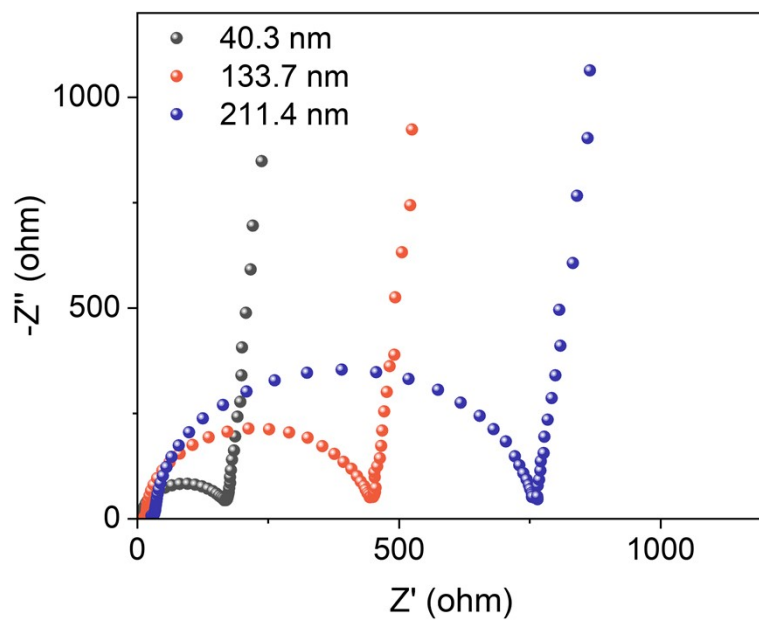

**Fig. S6** EIS analysis of TAPC:3TPYMB nanoparticles with sizes of 40.3, 133.7, and 211.4 nm.

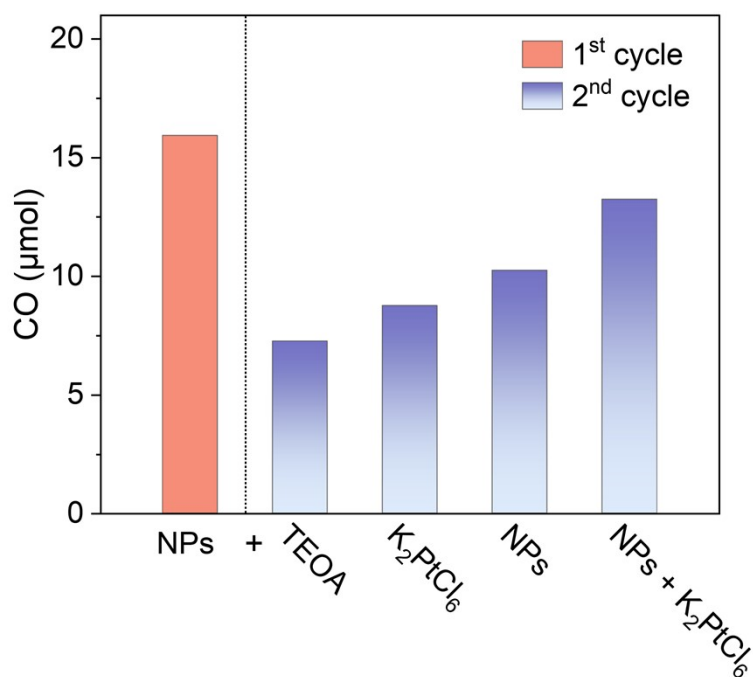

**Fig. S7** Recycle experiments. CO<sub>2</sub> photoreduction was first performed in the presence of TAPC:3TPYMB NPs, K<sub>2</sub>PtCl<sub>6</sub>, and TEOA under 365 nm LED irradiation. After the first cycle, TEOA, K<sub>2</sub>PtCl<sub>6</sub>, NPs, or NPs + K<sub>2</sub>PtCl<sub>6</sub> were added for the second cycle. The irradiation time of each cycle was 12 h. TAPC:3TPYMB NPs: 9.78 μM; K<sub>2</sub>PtCl<sub>6</sub>: 0.077 μM; TEOA: 0.1 M.

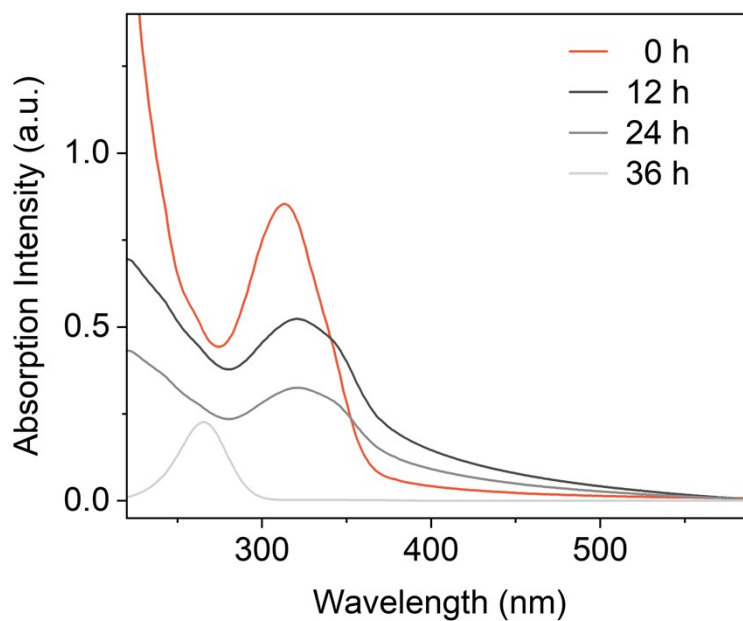

**Fig. S8** UV-vis absorption spectra of TAPC:3TPYMB NPs were recorded before reaction and after different irradiation times. The spectra at 0, 12, 24, and 36 h correspond to the fresh sample, the sample after the first 12 h photocatalytic reaction, the sample after 24 h irradiation, and the sample after 36 h irradiation, respectively.

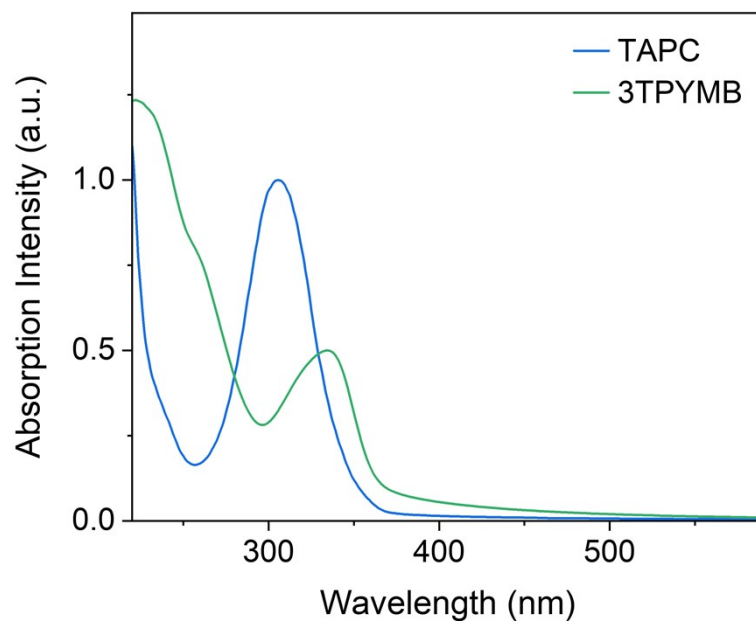

**Fig. S9** UV-visible absorption spectra of TAPC and 3TPYMB nanoparticles.

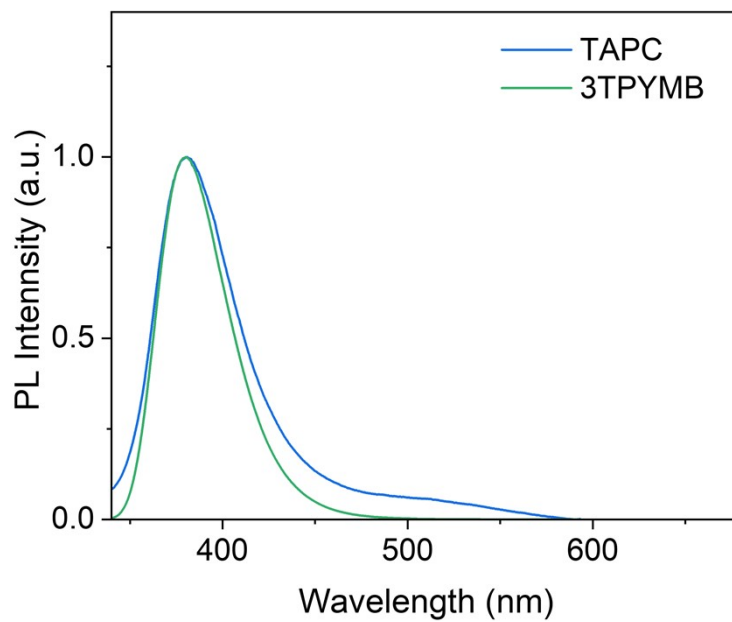

**Fig. S10** Photoluminescence spectra of TAPC and 3TPYMB nanoparticles (excitation wavelength: 340 nm).

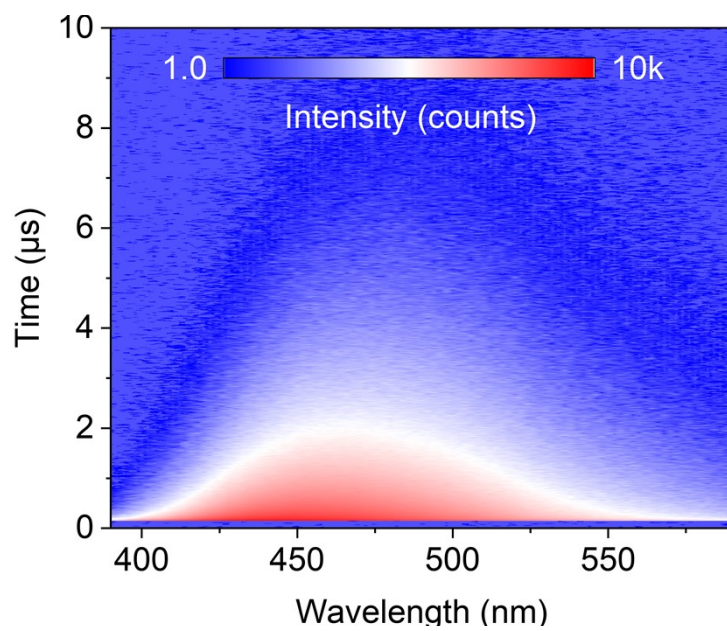

**Fig. S11** Time resolved emission contour map of TAPC:3TPYMB nanoparticles.

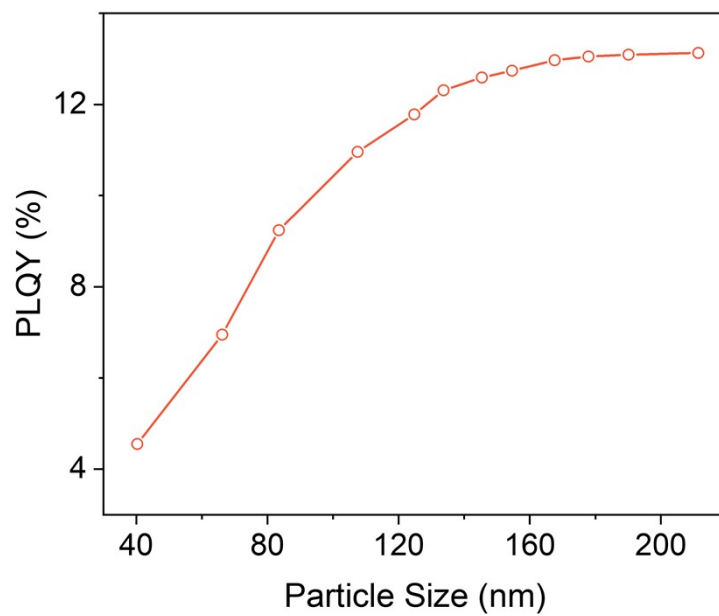

**Fig. S12** PLQY values of TAPC:3TPYMB NPs with different particle sizes.

**Table S3 Radiative decay rates of NPs with different particle sizes**

| Size (nm) | $\Phi$ (%) | $\Phi_{PF}$ (%) | $\Phi_{DF}$ (%) | $\tau_p$ (ns) | $\tau_d$ (ns) | $k_r$ ( $10^5$ s $^{-1}$ ) |
|-----------|------------|-----------------|-----------------|---------------|---------------|----------------------------|
| 40.3      | 4.55       | 0.82            | 2.15            | 58.70         | 270.49        | 1.41                       |
| 66.2      | 6.95       | 1.57            | 4.40            | 61.64         | 355.28        | 2.55                       |
| 83.5      | 9.24       | 1.97            | 6.74            | 83.25         | 394.69        | 2.37                       |
| 107.5     | 10.96      | 2.12            | 6.90            | 84.99         | 599.73        | 2.49                       |
| 124.8     | 11.78      | 2.37            | 8.46            | 88.34         | 587.40        | 2.68                       |
| 133.7     | 12.31      | 3.22            | 8.52            | 88.06         | 632.44        | 3.65                       |
| 145.4     | 12.59      | 3.71            | 8.53            | 94.68         | 653.25        | 3.92                       |
| 154.6     | 12.74      | 3.65            | 8.75            | 95.50         | 669.44        | 3.83                       |
| 167.6     | 12.97      | 3.79            | 8.87            | 102.68        | 675.25        | 3.69                       |
| 177.9     | 13.05      | 3.52            | 8.83            | 107.83        | 714.80        | 3.26                       |
| 190.1     | 13.09      | 3.95            | 8.80            | 110.47        | 742.39        | 3.57                       |
| 211.4     | 13.13      | 4.49            | 8.44            | 124.68        | 764.25        | 3.60                       |

We calculated the radiative decay rates ( $k_r$ ) of TAPC:3TPYMB NPs using PLQY and fluorescence lifetime data. The transient PL decay curves were fitted with a three exponential function. The prompt fluorescence quantum yield ( $\Phi_{PF}$ ) and delayed fluorescence quantum yield ( $\Phi_{DF}$ ) were estimated from the total PL quantum yield ( $\Phi_{PL}$ ) and the integrated area fractions of the assigned prompt and delayed fluorescence components. The quantum yields and rate constants were calculated using the following equations according to the reported method.<sup>14</sup>

$$(1) \Phi_{PF} = \Phi_{PL}r_{PF}; r_{PF} = \tau_p A_2 / (\tau_1 A_1 + \tau_p A_2 + \tau_d A_3)$$

$$(2) \Phi_{DF} = \Phi_{PL}r_{DF}; r_{DF} = \tau_d A_3 / (\tau_1 A_1 + \tau_p A_2 + \tau_d A_3)$$

$$(3) k_r = \Phi_{PF} / \tau_p$$

where  $A_1$ ,  $A_2$ , and  $A_3$  are the fitted amplitudes of the minor, prompt, and delayed components, respectively.

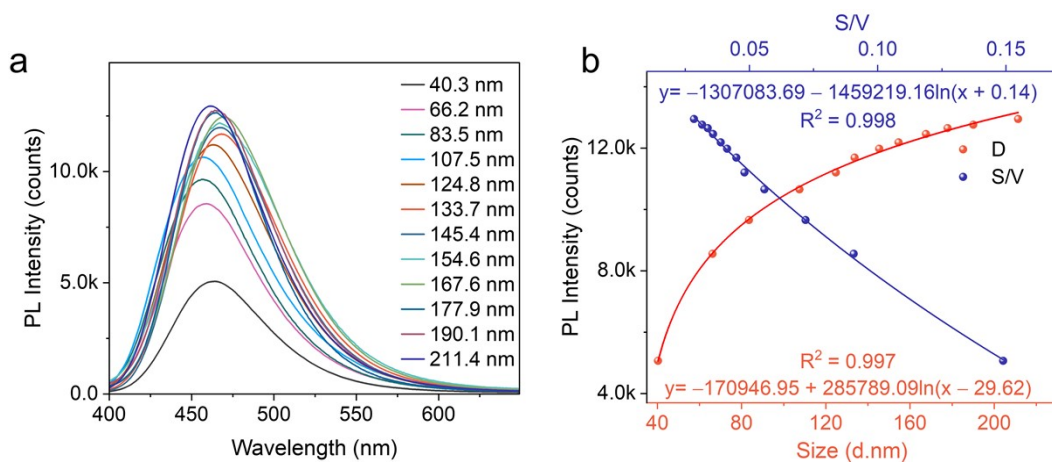

**Fig. S13** (a) PL spectra of TAPC:3TPYMB NPs with different particle sizes. (b) Dependence of PL intensity and calculated surface area to volume ratio (S/V) on particle size.

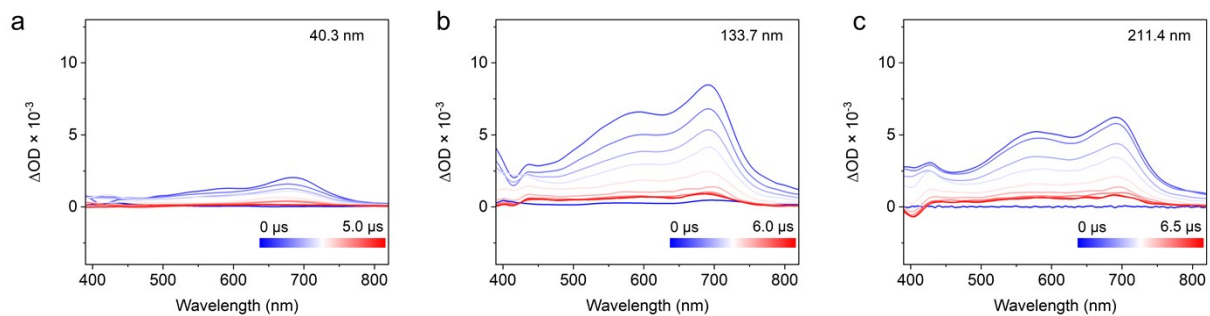

**Fig. S14** (a-c) Transient absorption (TA) spectra of TAPC:3TPYMB (5:5) NPs (33.3 nm, 63.9 nm and 212.9 nm), excited at 340 nm.

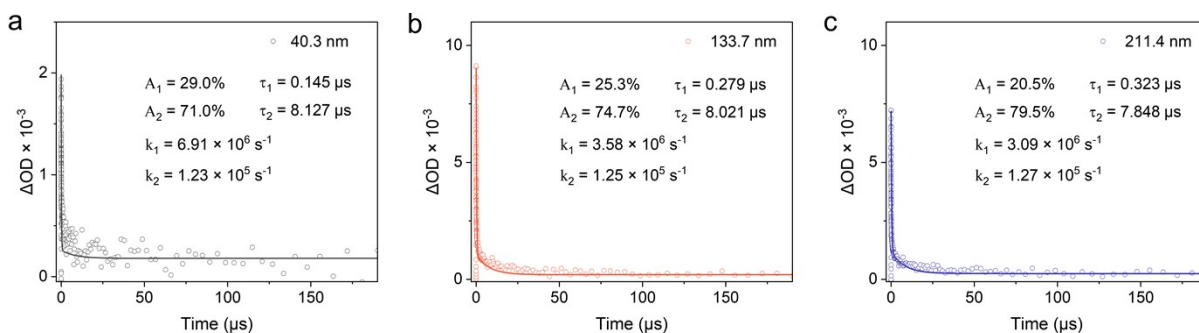

**Fig. S15** Biexponential fitting of TA decay traces at 700 nm for TAPC:3TPYMB NPs with sizes of (a) 40.3 nm, (b) 133.7 nm, and (c) 211.4 nm.

In TAPC based exciplex systems, the transient absorption signal around 700 nm has been assigned to the absorption of the TAPC radical cation [TAPC]<sup>•+</sup>.<sup>15</sup> Therefore, in the present TAPC:3TPYMB system, the TA decay at 700 nm can be used to monitor the dynamics of CT related charge species. The decay traces were fitted using the following biexponential function:

$$\Delta OD(t) = A_1 \exp(-t/\tau_1) + A_2 \exp(-t/\tau_2)$$

where  $\tau_1$  represents the fast decay process of CT related charge species, and  $\tau_2$  represents the slow decay process of long-lived CT related charge species. The corresponding apparent decay rate constants were calculated as  $k_1 = 1/\tau_1$  and  $k_2 = 1/\tau_2$ .

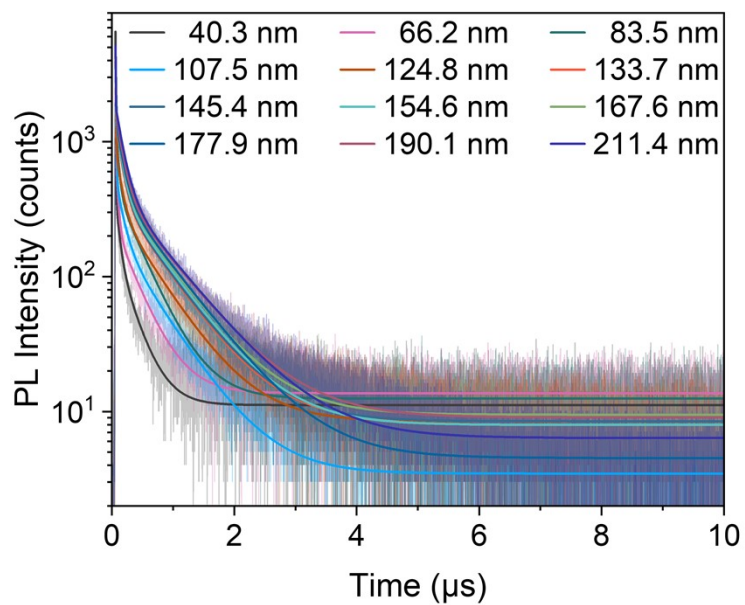

**Fig. S16** Transient fluorescence decay curves for TAPC:3TPYMB (5:5) nanoparticles of varying sizes (excitation wavelength: 375 nm)

**Table S4 Fitting parameters of transient fluorescence decay curves for TAPC:3TPYMB nanoparticles**

| Size (nm) | A <sub>1</sub> (%) | τ <sub>1</sub> (ns) | A <sub>2</sub> (%) | τ <sub>2</sub> (ns) | A <sub>3</sub> (%) | τ <sub>3</sub> (ns) | τ (ns) |
|-----------|--------------------|---------------------|--------------------|---------------------|--------------------|---------------------|--------|
| 40.3      | 34.61              | 4.60                | 18.13              | 58.70               | 47.26              | 270.49              | 140.07 |
| 66.2      | 14.00              | 4.09                | 22.66              | 61.64               | 63.35              | 355.28              | 239.60 |
| 83.5      | 5.74               | 3.72                | 21.31              | 83.25               | 72.95              | 394.69              | 305.88 |
| 107.5     | 17.70              | 8.94                | 19.33              | 84.99               | 62.97              | 599.73              | 395.66 |
| 124.8     | 8.14               | 5.50                | 20.08              | 88.34               | 71.78              | 587.40              | 439.82 |
| 133.7     | 4.66               | 4.72                | 26.13              | 88.06               | 69.21              | 632.44              | 460.92 |
| 145.4     | 2.81               | 3.01                | 29.46              | 94.68               | 67.73              | 653.25              | 470.40 |
| 154.6     | 2.63               | 2.95                | 28.68              | 95.50               | 68.69              | 669.44              | 487.30 |
| 167.6     | 2.39               | 2.87                | 29.21              | 102.68              | 68.40              | 675.25              | 491.92 |
| 177.9     | 5.35               | 7.23                | 26.97              | 107.83              | 67.68              | 714.80              | 513.26 |
| 190.1     | 2.62               | 3.68                | 30.14              | 110.47              | 67.24              | 742.39              | 532.59 |
| 211.4     | 1.52               | 2.40                | 34.21              | 124.68              | 64.28              | 764.25              | 533.92 |

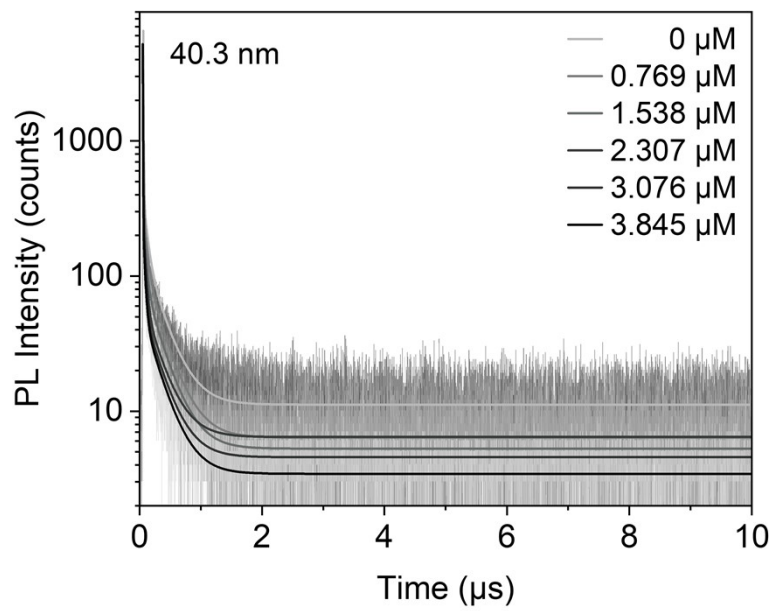

**Fig.S17** Transient photoluminescence decay curves of 40.3 nm TAPC:3TPYMB (5:5) nanoparticles with varying concentrations of  $\text{K}_2\text{PtCl}_6$ .

**Table S5 Fitting parameters of transient fluorescence decay curves for 40.3 nm TAPC:3TPYMB nanoparticles under different K<sub>2</sub>PtCl<sub>6</sub> Concentrations**

| K <sub>2</sub> PtCl <sub>6</sub> (μM) | A <sub>1</sub> (%) | τ <sub>1</sub> (ns) | A <sub>2</sub> (%) | τ <sub>2</sub> (ns) | A <sub>3</sub> (%) | τ <sub>3</sub> (ns) | τ (ns) |
|---------------------------------------|--------------------|---------------------|--------------------|---------------------|--------------------|---------------------|--------|
| 0                                     | 34.61              | 4.60                | 18.13              | 58.70               | 47.26              | 270.49              | 140.07 |
| 0.769                                 | 38.38              | 5.83                | 18.11              | 52.51               | 43.51              | 268.65              | 128.64 |
| 1.538                                 | 41.70              | 4.94                | 17.03              | 40.26               | 41.27              | 265.93              | 118.66 |
| 2.307                                 | 38.77              | 3.16                | 22.93              | 37.18               | 38.30              | 261.57              | 109.93 |
| 3.076                                 | 44.47              | 3.40                | 18.68              | 28.88               | 36.84              | 259.99              | 102.70 |
| 3.845                                 | 46.07              | 3.40                | 19.35              | 28.88               | 34.58              | 259.99              | 97.05  |

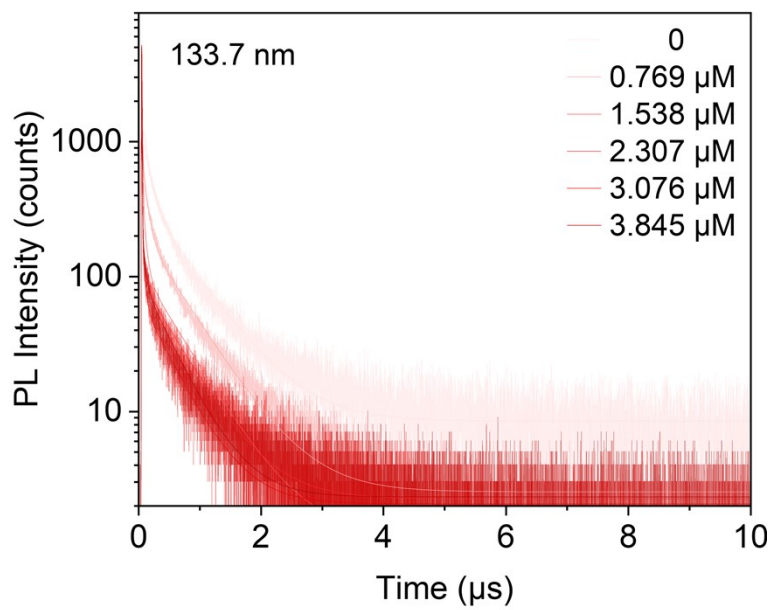

**Fig.S18** Transient photoluminescence decay curves of 133.7 nm TAPC:3TPYMB (5:5) nanoparticles with varying concentrations of  $\text{K}_2\text{PtCl}_6$ .

**Table S6 Fitting parameters of transient fluorescence decay curves for 133.7 nm TAPC:3TPYMB nanoparticles under different K<sub>2</sub>PtCl<sub>6</sub> Concentrations**

| K <sub>2</sub> PtCl <sub>6</sub> (μM) | A <sub>1</sub> (%) | τ <sub>1</sub> (ns) | A <sub>2</sub> (%) | τ <sub>2</sub> (ns) | A <sub>3</sub> (%) | τ <sub>3</sub> (ns) | τ (ns) |
|---------------------------------------|--------------------|---------------------|--------------------|---------------------|--------------------|---------------------|--------|
| 0                                     | 4.66               | 4.72                | 26.13              | 88.06               | 69.21              | 632.44              | 460.92 |
| 0.769                                 | 11.86              | 5.41                | 23.38              | 69.92               | 64.76              | 598.98              | 404.90 |
| 1.538                                 | 24.61              | 7.72                | 13.12              | 50.44               | 62.27              | 571.60              | 364.44 |
| 2.307                                 | 30.17              | 4.44                | 9.34               | 45.47               | 60.49              | 537.27              | 330.60 |
| 3.076                                 | 36.45              | 4.68                | 5.98               | 40.00               | 57.57              | 504.94              | 294.77 |
| 3.845                                 | 34.96              | 4.44                | 10.81              | 45.47               | 54.22              | 487.27              | 270.68 |

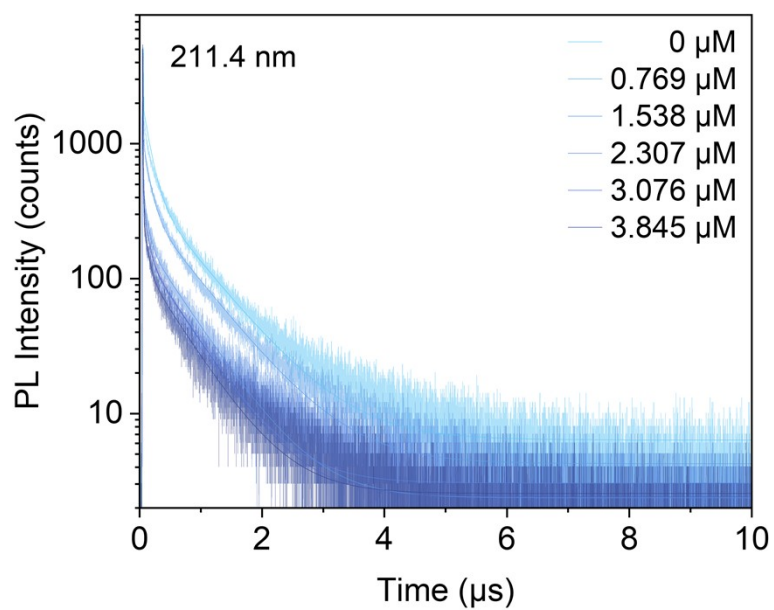

**Fig.S19** Transient photoluminescence decay curves of 211.4 nm TAPC:3TPYMB (5:5) nanoparticles with varying concentrations of  $\text{K}_2\text{PtCl}_6$ .

**Table S7 Fitting parameters of transient fluorescence decay curves for 211.4 nm TAPC:3TPYMB nanoparticles under different K<sub>2</sub>PtCl<sub>6</sub> Concentrations**

| K <sub>2</sub> PtCl <sub>6</sub> (μM) | A <sub>1</sub> (%) | τ <sub>1</sub> (ns) | A <sub>2</sub> (%) | τ <sub>2</sub> (ns) | A <sub>3</sub> (%) | τ <sub>3</sub> (ns) | τ (ns) |
|---------------------------------------|--------------------|---------------------|--------------------|---------------------|--------------------|---------------------|--------|
| 0                                     | 1.52               | 2.40                | 34.21              | 124.68              | 64.28              | 764.25              | 533.92 |
| 0.769                                 | 6.14               | 5.31                | 25.99              | 104.75              | 67.87              | 711.38              | 510.35 |
| 1.538                                 | 11.17              | 3.89                | 13.51              | 66.88               | 75.32              | 627.14              | 481.82 |
| 2.307                                 | 11.96              | 3.47                | 14.24              | 65.39               | 73.80              | 608.39              | 458.71 |
| 3.076                                 | 15.64              | 4.27                | 14.02              | 65.95               | 70.33              | 602.93              | 433.98 |
| 3.845                                 | 20.52              | 4.61                | 12.47              | 61.37               | 67.02              | 595.80              | 407.88 |

## References

1. Y. Wang, X. W. Gao, J. Li and D. Chao, *Chem Commun.*, 2020, **56**, 12170-12173.
2. F. Ma, Z.-M. Luo, J.-W. Wang and G. Ouyang, *J. Am. Chem. Soc.*, 2024, **146**, 17773-17783.
3. F. Droghetti, L. Villa, A. Sartorel, L. Dell'Amico, A. Ruggi and M. Natali, *ChemSusChem*, 2025, **18**, e202402627.
4. Y. Fang, X. Hong, Y. Fu, Y. Li and D. Chao, *Molecular Catalysis*, 2023, **551**, 113610.
5. Y. Fang, T. Liu, L. Chen and D. Chao, *Chem Commun.*, 2022, **58**, 7972-7975.
6. E. Bassan, R. Inoue, D. Fabry, F. Calogero, S. Potenti, A. Gualandi, P. G. Cozzi, K. Kamogawa, P. Ceroni, Y. Tamaki and O. Ishitani, *Sustainable Energy Fuels*, 2023, **7**, 3454-3463.
7. C. Xiong, P. Wang, Y. Ma, Y. Zhang, X. Cheng, C. Chao, L. Kang, G. Li, P. Sun, J. Shi, B. Tong, X. Shao, Z.-M. Zhang, Z. Cai and Y. Dong, *Nat. Commun.*, 2025, **16**, 6140.
8. Y.-X. Pan, Y. You, S. Xin, Y. Li, G. Fu, Z. Cui, Y.-L. Men, F.-F. Cao, S.-H. Yu and J. B. Goodenough, *J. Am. Chem. Soc.*, 2017, **139**, 4123-4129.
9. D. Zhang, J. Zhong, L. Tong, P. Chen, X. Jiang, L. Wang, X. Zhan, H. Yang, H. Zhu, Y. Luo and W. Yang, *Sep Purif Technol*, 2025, **368**, 133089.
10. C. Cometto, R. Kuriki, L. Chen, K. Maeda, T.-C. Lau, O. Ishitani and M. Robert, *J. Am. Chem. Soc.*, 2018, **140**, 7437-7440.
11. A. P. Rangappa, D. Praveen Kumar, Y. Hong, S. Jeong, D. A. Reddy, J. K. Song and T. K. Kim, *ACS Appl. Energy Mater.*, 2020, **3**, 10533-10540.
12. H. Rajashekhar, D. Vrushabendrakumar, K. M. Alam, N. Kumar, J. C. Garcia and K. Shankar, *ACS Appl. Nano Mater.*, 2025, **8**, 1786-1795.
13. H. Li, Q. Song, S. Wan, C. W. Tung, C. Liu, Y. Pan, G. Luo, H. M. Chen, S. Cao, J. Yu and L. Zhang, *Small*, 2023, **19**, 2301711.
14. G. Meng, H. Dai, Q. Wang, J. Zhou, T. Fan, X. Zeng, X. Wang, Y. Zhang, D. Yang, D. Ma, D. Zhang and L. Duan, *Nat Commun.*, 2023, **14**, 2394.
15. Y. Ueda, H. Nakanotani, T. Hosokai, Y. Tanaka, H. Hamada, H. Ishii, S. Santo and C. Adachi, *Adv. Optical Mater.*, 2020, **8**, 2000896.
